# Supplementary material for: A novel technique using chronic infusion of small extracellular vesicles from gestational diabetes mellitus causes glucose intolerance in pregnant mice
Source: Oxford University Press journal article supplement (doi:10.1042/cs20220484), 2022-10-14
Supplement: cs-2022-0484_supp.pdf [file cs-2022-0484_supp.pdf]

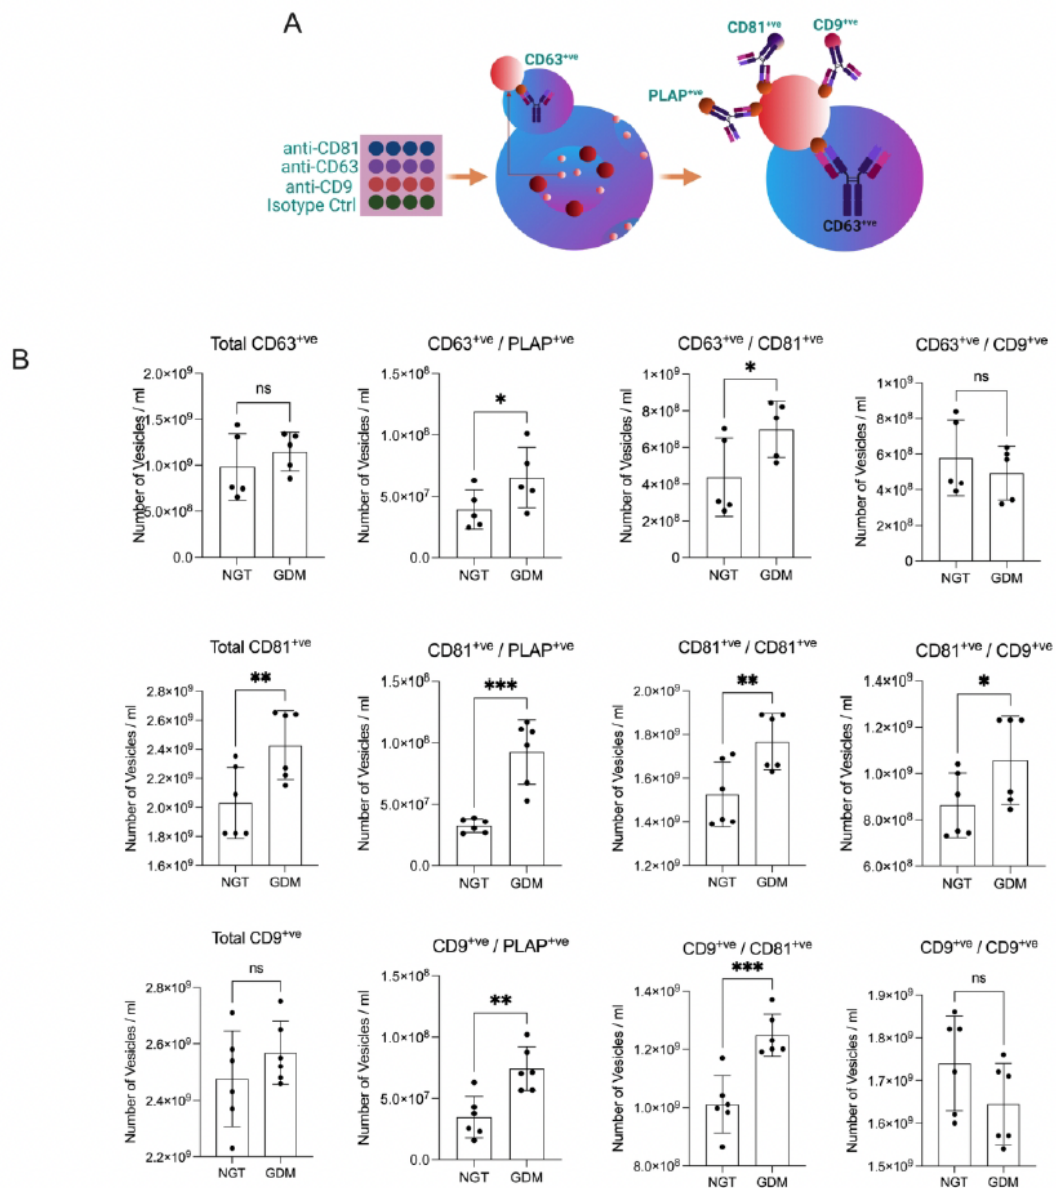

Supplemental Figure 1

**Supplemental Figure 1. Single particle analysis.** Particle concentrations were obtained using ExoView R100 (Nanoview Biosciences) analysis. A) schematic representation of a typical ExoView assays use generic extracellular vesicles (EV) markers to capture general EV from solution (i.e., tetraspanin: CD63, CD81, and CD9). Captured EV can then be probed for other proteins (e.g., PLAP) that may indicate origin or function. B) Vesicle count using CD63, CD81 or CD9 captured antibody on circulating EV from NGT and GDM and detected using CD9, PLAP or CD81. In B, \* $p < 0.05$ ; \*\* $p < 0.01$ ; \*\*\* $p < 0.001$ .

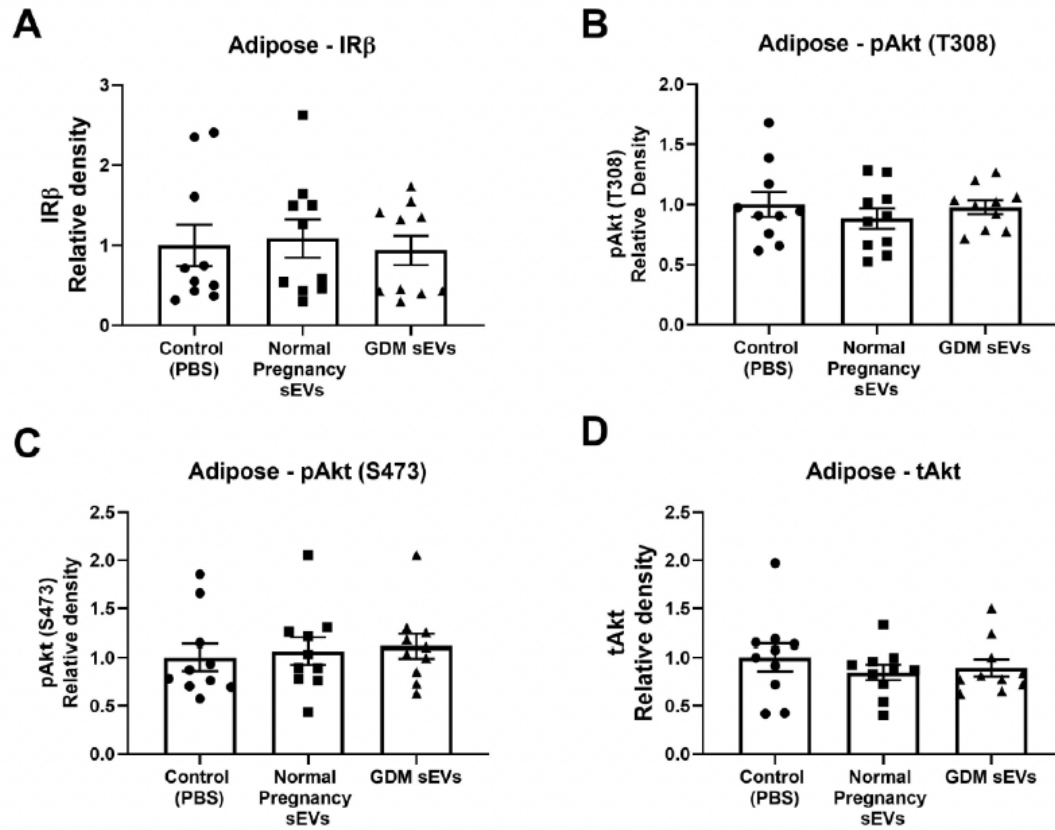

Supplemental Figure 2

**Supplemental Figure 2. Insulin signaling in adipose tissue.** Adipose tissue was collected after 4 days of continuous infusion of PBS or sEV from healthy women or women with GDM in pregnant mice (n=10/group). Insulin signaling targets (A) IR $\beta$ , (B) pAkt (S473), (C) pAkt (T308) and (D) tAkt were determined by western blot. Data shown as mean  $\pm$  SEM, one-way ANOVA.

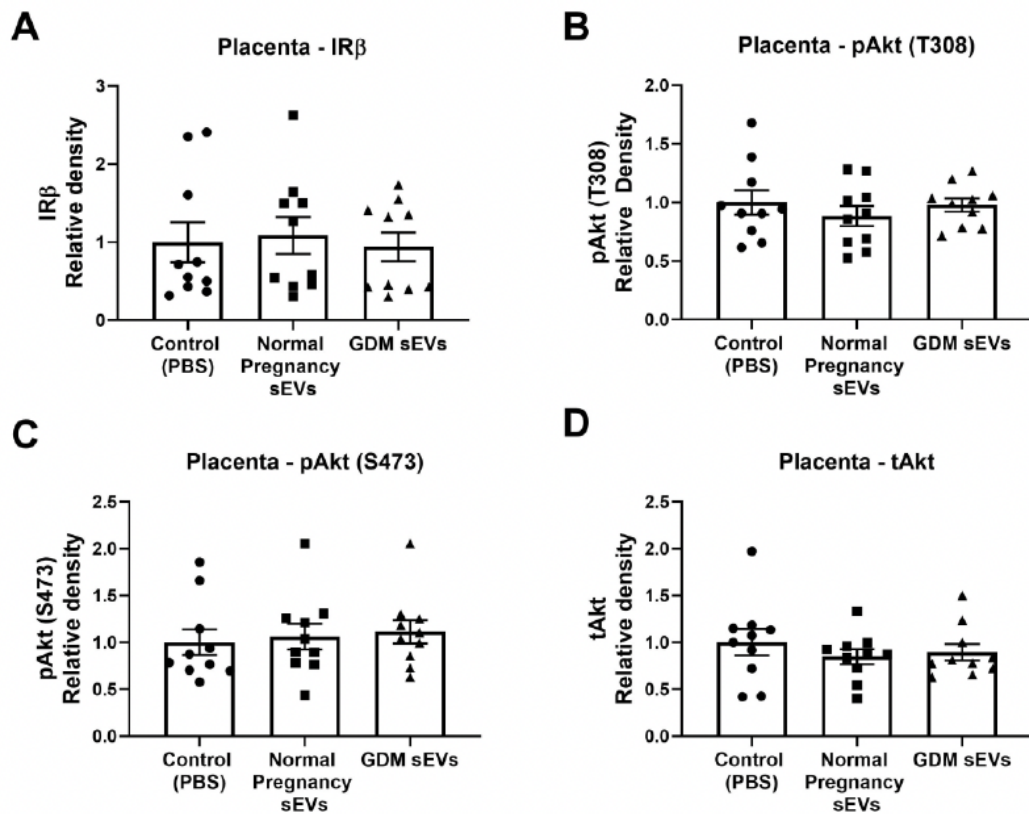

Supplemental Figure 3

**Supplemental Figure 3. Insulin signaling in placental tissue.** Placental tissue was collected from pregnant mice after 4 days of continuous PBS or sEV infusion from healthy women or women with GDM (n=10/group). Insulin signaling targets (A) IR $\beta$ , (B) pAkt (S473), (C) pAkt (T308) and (D) tAkt were determined by western blot. Data shown as mean  $\pm$  SEM, one-way ANOVA.

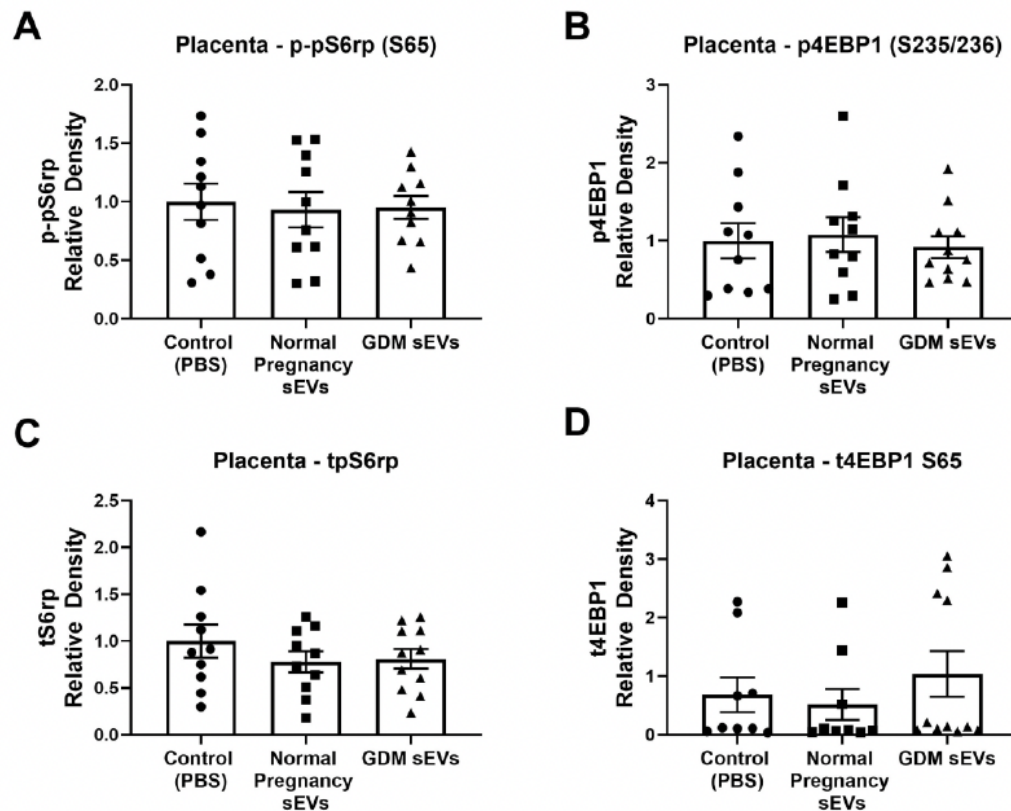

Supplemental Figure 4

**Supplemental Figure 4. mTOR signaling in placental tissue.** Placental tissue was collected from pregnant mice after 4 days of continuous PBS or sEV infusion from healthy women or women with GDM. mTOR signaling targets (A) total pS6rp, (B) phosphorylated pS6rp (S65), (C) total 4EBP1 and (D) phosphorylated 4EBP1 (S235/236) were determined by western blot (n=9-11/group). Data shown as mean  $\pm$  SEM, one-way ANOVA.

**Supplementary Table 1.** Fasting blood glucose concentrations

| Minutes   | Control (PBS)<br>(mM) | Healthy<br>Pregnancy (mM) | GDM<br>(mM)  | ANOVA  |
|-----------|-----------------------|---------------------------|--------------|--------|
| <b>0</b>  | 130.3 ± 3.3           | 130.5 ± 2.2               | 128 ± 3.1    | 0.786  |
| <b>15</b> | 237.2 ± 17.8          | 217.1 ± 10.2              | 267.9 ± 17.1 | 0.083  |
| <b>30</b> | 227.7 ± 16.6          | 192.9 ± 11.1              | 253.0 ± 20.4 | 0.046* |
| <b>45</b> | 150.7 ± 6.8           | 134.9 ± 7.6               | 176.7 ± 15.3 | 0.026* |
| <b>90</b> | 112.9 ± 4.2           | 103.8 ± 5.0               | 122.7 ± 8.6  | 0.109  |

**Supplemental Table 2.** The most common route of administration is via a tail vein injection (intravenous). Extracellular vesicles (EV) were diluted in sterile PBS ranging in volumes of 80 – 200 µL containing 5-400 µg of total EV proteins.

| Route of administration                   | Excipient                          | EV Dose                                                                                                       | Volume    | Injection regiment               | Aim of project                    | Animal strain                             | EV labelling                                        | Reference |
|-------------------------------------------|------------------------------------|---------------------------------------------------------------------------------------------------------------|-----------|----------------------------------|-----------------------------------|-------------------------------------------|-----------------------------------------------------|-----------|
| Tail vein injection                       | 5% glucose                         | 150 µg                                                                                                        | 80 µL     | 1 dose                           | siRNA delivery                    | C57BL/6 male 8-10 week old                | NA                                                  | [1]       |
| Osmotic pumps                             | PBS                                | $2.7 \times 10^{12}$                                                                                          | 100µl PBS | infused continuously over 4 days | Effect on glucose homeostasis     | Non-pregnant female C57/Bl6               | NA                                                  | [2]       |
| Tail vein injection                       | -                                  | ~5 µg                                                                                                         | -         | 1 dose                           | <i>In vivo</i> tracking           | C57BL/6, BALB/c ( <i>in vivo</i> imaging) | PKH26 red fluorescent                               | [3]       |
| Retro-orbital vein or tail vein injection | PBS                                | 100 µg                                                                                                        | -         | 1 dose                           | <i>In vivo</i> EV bioluminescence | Athymic Nude Mouse                        | Endogenously labelled exosome-Luciferase and biotin | [4]       |
| Tail vein injection                       | PBS                                | $1.5 \times 10^{10}$ particles/gram body weight (p/g), $1.0 \times 10^{10}$ p/g and $0.25 \times 10^{10}$ p/g | -         | 1 dose                           | Biodistribution                   | Female NMRI or C57BL/6                    | Fluorescent lipophilic tracer DiR                   | [5]       |
| Intradermal                               | Saline                             | 3-5 µg of exosomes                                                                                            | -         | 1 dose                           | Drug delivery                     | DBA/2J, BALB/c                            |                                                     | [6]       |
| IV                                        | -                                  | ~5 µg                                                                                                         | -         | 1 dose                           | Macrophage dependent clearance    | BALB/c 5 week old male                    | PKH26                                               | [7]       |
| Tail vein injection                       | 5% glucose or PBS with 5% glucose? | 150 µg                                                                                                        | -         | -                                | Methods paper                     | C57BL/6 mice                              | Cellmask                                            | [8]       |
| Tail vein injection                       | PBS                                | 400 µg                                                                                                        | 200 µL    |                                  | Safety profile                    | Sprague-Dawley rats                       |                                                     | [9]       |

|                       |                  |                                          |             |                            |                                                                                                         |                            |                                   |      |
|-----------------------|------------------|------------------------------------------|-------------|----------------------------|---------------------------------------------------------------------------------------------------------|----------------------------|-----------------------------------|------|
| Tail vein injection   | PBS              | $2 \times 10^{11}$                       | 200 $\mu$ L | 1 dose                     | If skeletal muscle exosomes can be taken up by pancreatic beta cells                                    | C57BL/6 male               | Fluorescent lipophilic tracer DiR | [10] |
| Tail vein             |                  | 10 $\mu$ g                               |             | 2 doses. Day 5 and day 16  | Investigate the mechanism of action of exosome in vivo                                                  | Lewis rats                 | PKH26                             | [11] |
| Tail vein             | PBS              | 10 $\mu$ g                               | 100         | 1 dose                     | Functionality of exosome                                                                                | C57BL/6                    | Fluorescent lipophilic tracer DiR | [12] |
| Different wound sites |                  | 5 or 50 $\mu$ g                          | 200 $\mu$ L | 1 dose                     | Exosome in wound healing                                                                                | Diabetic B6.Leprdb/db mice | PKH67                             | [13] |
| Tail vein             | PBS              | 2 $\mu$ g/g body weight                  | 150 $\mu$ L | 1 dose                     | Exosomal miR-223 in cardioprotection                                                                    | C57BL/6                    | PKH26                             | [14] |
| Subcutaneously        | PBS              | 100 $\mu$ g                              | 200 $\mu$ L | Twice a week for 50 days   | Role of CML derived exosome in tumour growth                                                            | NOD/SCID, 4-5 weeks        | NA                                | [15] |
| IV                    | PBS              |                                          | 150 $\mu$ L | 6 doses at 48 hr intervals | Serum-derived exosomes from highly metastatic breast cancer transfer the metastatic capacity            | WT BALB/c                  | NA                                | [16] |
| Right hand paw        | PBS              | 10 $\mu$ g                               | 50 $\mu$ L  | 1 dose                     | Plasma-derived MHCII+ exosomes from tumor-bearing mice suppress tumor antigen-specific immune responses | C57BL/6                    | NA                                | [17] |
| Skin tissue           | HBSS             | $10^6$                                   | 50 $\mu$ L  | 1 dose                     | Tracking of tumour extracellular vesicle delivery                                                       | C57BL/6                    | GFP and GlucB via lentiviral      | [18] |
| Peri-infarct sites    | Iscoe's Modified | $2.8 \times 10^9$ and $1.56 \times 10^9$ | 40 $\mu$ L  | 1 dose                     | Exosome in cardiac regeneration                                                                         | SCID                       | NA                                | [19] |

|                   |                   |       |                |                            |                                                                                                                              |         |    |      |
|-------------------|-------------------|-------|----------------|----------------------------|------------------------------------------------------------------------------------------------------------------------------|---------|----|------|
|                   | Dulbecco's (IMDM) |       |                |                            |                                                                                                                              |         |    |      |
| Intranasally      | PBS               | 25 µg |                | 1 dose                     | Exosome from Mycobacteria-infected mice recruit and activate immune cells                                                    | C57BL/6 | NA | [20] |
| Tail vein         | PBS               | 10 µg | 100-200 µL PBS | 3 times / week for 3 weeks | Melanoma exosomes educate bone marrow progenitor cells toward a pro-metastatic phenotype through MET                         | C57BL/6 | NA | [21] |
| Intrasplenically  | HBBS              | 10 µg |                | Every 3 days for 28 days   | Exosome in colorectal cancer liver metastasis                                                                                | Balb/c  | NA | [22] |
| Intraperitoneal   |                   | 10 µg | 100 µL         | 1 dose                     | Intestinal epithelial exosomes carry MHC class II/peptides able to inform the immune system in mice                          | C3H/HeN | NA | [23] |
| Intraperitoneally | PBS               | 25 µg | 200 µL         | 1 dose                     | DC derived exosomes induce protection against infection in mice                                                              | BALB/c  | NA | [24] |
| Intraperitoneally |                   | 30 µg |                | Day 2,4,6                  | define the effect of granulocytic MDSC-derived exosomes (G-MDSC exo) in dextran sulphate sodium (DSS)-induced murine colitis | C57BL/6 | NA | [25] |

|                |        |            |       |                                                      |                                                                                                   |                                     |            |      |
|----------------|--------|------------|-------|------------------------------------------------------|---------------------------------------------------------------------------------------------------|-------------------------------------|------------|------|
| Footpad        | PBS    | 50 µg      | 50 µL | 1 dose                                               | Exosomes Released by Melanoma Cells Prepare Sentinel Lymph Nodes for Tumor Metastasis             | B16-F10                             | DIR or DIL | [26] |
| Intravenously  |        | 100 µg     |       | 2 doses / week for 3 weeks                           | Contribution of MyD88 to the tumor exosome-mediated induction of myeloid derived suppressor cells | B6 wild-type mice or MyD88 knockout | NA         | [27] |
| Subcutaneously | PBS    | 0.3 µg     | 50 µL | 1 dose / day for 4 days. Every other day for 15 days | Mesenchymal Stem Cells Secrete Immunologically Active Exosomes                                    | C57BL/6J                            | NA         | [28] |
| Subcutaneously | Saline | 2.5 ± 5 µg |       | 3 times at 2-week intervals                          | Immune protection effect of exosomes against attack of L1210 tumor cells                          | DBA/2                               | NA         | [29] |

## References

1. Alvarez-Erviti, L., et al., *Delivery of siRNA to the mouse brain by systemic injection of targeted exosomes*. Nat Biotech, 2011. **29**(4): p. 341-345.
2. James-Allan, L.B., et al., *Regulation of glucose homeostasis by small extracellular vesicles in normal pregnancy and in gestational diabetes*. FASEB J, 2020. **34**(4): p. 5724-5739.
3. Takahashi, Y., et al., *Visualization and in vivo tracking of the exosomes of murine melanoma B16-BL6 cells in mice after intravenous injection*. Journal of Biotechnology, 2013. **165**(2): p. 77-84.
4. Lai, C.P., et al., *Dynamic Biodistribution of Extracellular Vesicles in Vivo Using a Multimodal Imaging Reporter*. ACS Nano, 2014. **8**(1): p. 483-494.
5. Wiklander, O.P.B., et al., *Extracellular vesicle in vivo biodistribution is determined by cell source, route of administration and targeting*. Journal of Extracellular Vesicles, 2015.

6. Zitvogel, L., et al., *Eradication of established murine tumors using a novel cell-free vaccine: dendritic cell derived exosomes*. Nat Med, 1998. **4**(5): p. 594-600.
7. Imai, T., et al., *Macrophage-dependent clearance of systemically administered B16BL6-derived exosomes from the blood circulation in mice*. Journal of Extracellular Vesicles, 2015. **4**: p. 10.3402/jev.v4.26238.
8. El-Andaloussi, S., et al., *Exosome-mediated delivery of siRNA in vitro and in vivo*. Nat. Protocols, 2012. **7**(12): p. 2112-2126.
9. Sun, L., et al., *Safety evaluation of exosomes derived from human umbilical cord mesenchymal stromal cell*. Cytotherapy, 2016. **18**(3): p. 413-422.
10. Jalabert, A., et al., *Exosome-like vesicles released from lipid-induced insulin-resistant muscles modulate gene expression and proliferation of beta recipient cells in mice*. Diabetologia, 2016. **59**(5): p. 1049-1058.
11. Li, X.-L., et al., *Exosomes derived from atorvastatin-modified bone marrow dendritic cells ameliorate experimental autoimmune myasthenia gravis by up-regulated levels of IDO/Treg and partly dependent on FasL/Fas pathway*. Journal of Neuroinflammation, 2016. **13**(1): p. 8.
12. Liu, H., et al., *Exosomes derived from dendritic cells improve cardiac function via activation of CD4+ T lymphocytes after myocardial infarction*. Journal of Molecular and Cellular Cardiology, 2016. **91**: p. 123-133.
13. Geiger, A., A. Walker, and E. Nissen, *Human fibrocyte-derived exosomes accelerate wound healing in genetically diabetic mice*. Biochemical and Biophysical Research Communications, 2015. **467**(2): p. 303-309.
14. Wang, X., et al., *Exosomal miR-223 Contributes to Mesenchymal Stem Cell-Elicited Cardioprotection in Polymicrobial Sepsis*. Scientific Reports, 2015. **5**: p. 13721.
15. Raimondo, S., et al., *Chronic myeloid leukemia-derived exosomes promote tumor growth through an autocrine mechanism*. Cell Communication and Signaling, 2015. **13**(1): p. 8.
16. Gorkzynski, R.M., N. Erin, and F. Zhu, *Serum-derived exosomes from mice with highly metastatic breast cancer transfer increased metastatic capacity to a poorly metastatic tumor*. Cancer Medicine, 2016. **5**(2): p. 325-336.
17. Yang, C., et al., *Plasma-derived MHCII+ exosomes from tumor-bearing mice suppress tumor antigen-specific immune responses*. European journal of immunology, 2012. **42**(7): p. 1778-1784.
18. Lai, C.P., et al., *Visualization and tracking of tumour extracellular vesicle delivery and RNA translation using multiplexed reporters*. Nature Communications, 2015. **6**: p. 7029.
19. Ibrahim, Ahmed G.-E., K. Cheng, and E. Marbán, *Exosomes as Critical Agents of Cardiac Regeneration Triggered by Cell Therapy*. Stem Cell Reports, 2014. **2**(5): p. 606-619.
20. Singh, P.P., et al., *Exosomes Isolated from Mycobacteria-Infected Mice or Cultured Macrophages Can Recruit and Activate Immune Cells In Vitro and In Vivo*. The Journal of Immunology, 2012.
21. Peinado, H., et al., *Melanoma exosomes educate bone marrow progenitor cells toward a pro-metastatic phenotype through MET*. Nat Med, 2012. **18**(6): p. 883-891.
22. Wang, X., et al., *Investigation of the roles of exosomes in colorectal cancer liver metastasis*. Oncology reports, 2015. **33**(5): p. 2445-2453.
23. Van Niel, G., et al., *Intestinal epithelial exosomes carry MHC class II/peptides able to inform the immune system in mice*. Gut, 2003. **52**(12): p. 1690-1697.

24. Colino, J. and C.M. Snapper, *Dendritic Cell-Derived Exosomes Express a Streptococcus pneumoniae Capsular Polysaccharide Type 14 Cross-Reactive Antigen That Induces Protective Immunoglobulin Responses against Pneumococcal Infection in Mice*. Infection and Immunity, 2007. **75**(1): p. 220-230.
25. Wang, Y., et al., *Exosomes released by granulocytic myeloid-derived suppressor cells attenuate DSS-induced colitis in mice*. Oncotarget, 2016. **7**(13): p. 15356-15368.
26. Hood, J.L., R.S. San, and S.A. Wickline, *Exosomes released by melanoma cells prepare sentinel lymph nodes for tumor metastasis*. Cancer research, 2011. **71**(11): p. 3792-3801.
27. Liu, Y., et al., *Contribution of MyD88 to the tumor exosome-mediated induction of myeloid derived suppressor cells*. The American journal of pathology, 2010. **176**(5): p. 2490-2499.
28. Zhang, B., et al., *Mesenchymal stem cells secrete immunologically active exosomes*. Stem cells and development, 2013. **23**(11): p. 1233-1244.
29. Bu, N., et al., *Immune protection effect of exosomes against attack of L1210 tumor cells*. Leukemia & lymphoma, 2006. **47**(5): p. 913-918.
